# Supplementary material
Source: Springer Nature journal article supplement (https://www.springermedizin.de/resource/supplementary/12875_2014_1122_MOESM1_ESM.pdf/9435860)
Supplement: MOESM1 [file 9435860]

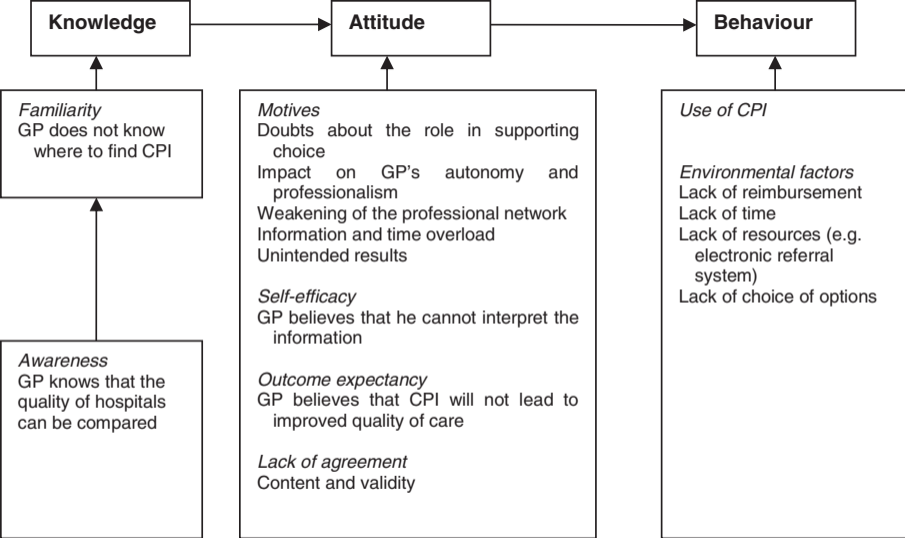

Based on Cabana et al.'s framework [30]

CPI = comparative performance information; GP = general practitioner
